# Supplementary material for: LRG-1 enhances the migration of thyroid carcinoma cells through promotion of the epithelial-mesenchymal transition by activating MAPK/p38 signaling
Source: PubMed Central journal article supplement — Oncol Rep. 2019 Apr 17;41(6):3270–80. doi: 10.3892/or.2019.7123 (PMC6488982; doi:10.3892/or.2019.7123), 2019-04-17
Supplement: Supplementary_Data.pdf [file Supplementary_Data.pdf]

Table SI. P-values of two groups in multiple comparisons using one-way analysis of variance (ANOVA) analysis followed by a post-hoc test.

| Index                                       | P-values     |             |
|---------------------------------------------|--------------|-------------|
| Figure 1                                    |              |             |
| Fig. 1F                                     |              |             |
| NTHY-ORI 3-1 vs. BCPAP                      |              | 0.941       |
| NTHY-ORI 3-1 vs. TPC-1                      |              | 0.012       |
| NTHY-ORI 3-1 vs. HTC/C3                     |              | 0.001       |
| NTHY-ORI 3-1 vs. SW579                      |              | 0.001       |
| Figure 4                                    |              |             |
| Fig. 4A                                     | HTC/C3 cells | SW579 cells |
| 0 vs. 100 ng/ml                             | 0.201        | 0.034       |
| 0 vs. 300 ng/ml                             | <0.001       | 0.013       |
| 0 vs. 500 ng/ml                             | <0.001       | 0.008       |
| Fig. 4B                                     |              |             |
| Control vs. LRG-1                           | 0.009        | 0.001       |
| LRG-1 vs. LRG-1+p38-I                       | 0.002        | 0.002       |
| Fig. 4C                                     |              |             |
| E-cadherin control vs. LRG-1                | 0.019        | 0.029       |
| E-cadherin LRG-1 vs. LRG-1+p38-I            | 0.024        | 0.042       |
| N-cadherin control vs. LRG-1                | 0.011        | 0.012       |
| N-cadherin LRG-1 vs. LRG-1+p38-I            | 0.014        | 0.011       |
| Vimentin control vs. LRG-1                  | 0.012        | 0.014       |
| Vimentin LRG-1 vs. LRG-1+p38-I              | 0.015        | 0.012       |
| Fig. 4D                                     |              |             |
| SNAIL1 control vs. LRG-1                    | 0.001        | 0.011       |
| SNAIL1 LRG-1 vs. LRG-1+p38-I                | 0.012        | 0.018       |
| SNAIL2 control vs. LRG-1                    | 0.014        | 0.001       |
| SNAIL2 LRG-1 vs. LRG-1+p38-I                | 0.018        | 0.003       |
| ZEB1 control vs. LRG-1                      | 0.015        | 0.012       |
| ZEB1 LRG-1 vs. LRG-1+p38-I                  | 0.048        | 0.015       |
| ZEB2 control vs. LRG-1                      | 0.018        | 0.012       |
| ZEB2 LRG-1 vs. LRG-1+p38-I                  | 0.055        | 0.040       |
| Figure 5                                    |              |             |
| Fig. 5A                                     |              |             |
| Control vs. LRG-1                           | 0.029        | 0.013       |
| LRG-1 vs. LRG-1+p38-I                       | 0.046        | 0.018       |
| Fig. 5B                                     |              |             |
| Control vs. LRG-1                           | 0.011        | 0.013       |
| LRG-1 vs. LRG-1+p38-I                       | 0.012        | 0.018       |
| LRG-1, leucine-rich-alpha-2-glycoprotein 1. |              |             |
